# Supplementary material for: cMET inhibitor crizotinib impairs angiogenesis and reduces tumor burden in the C3(1)-Tag model of basal-like breast cancer
Source: PubMed Central journal article supplement (PMC4799044; doi:10.1186/s40064-016-1920-3), 2016-03-19

# Additional File 2: Figure Supplement 2

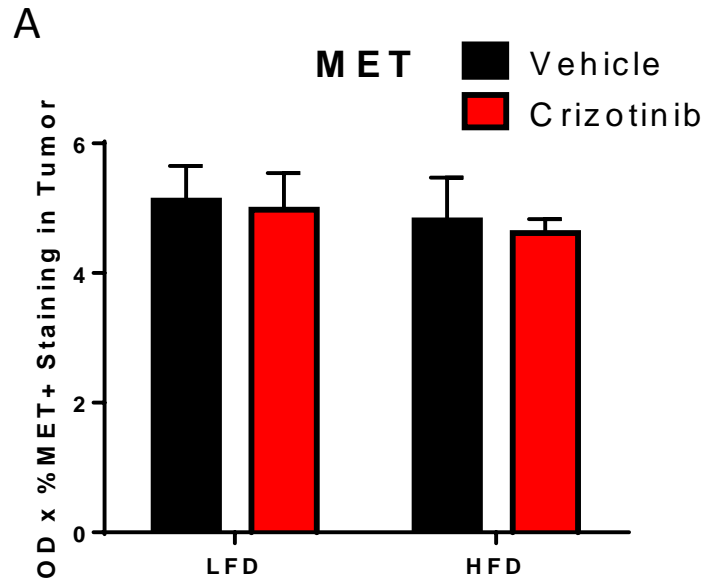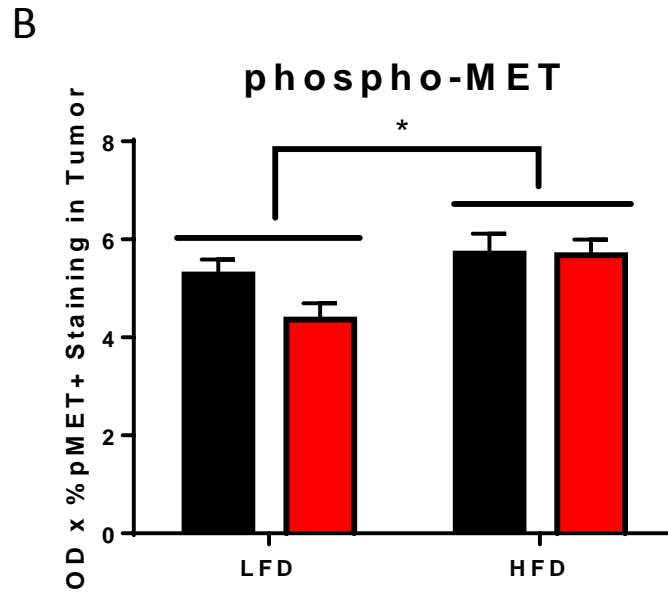

Supplement: 40064_2016_1920_MOESM2_ESM.pdf [file 40064_2016_1920_MOESM2_ESM.pdf]
